# Supplementary material
Source: publisher figshare collection journal article supplement (https://diabetesjournals.figshare.com/articles/dataset/_/25492276)
Supplement: Supplementary file 1 [file 1]

**Supplemental Table 1.** Association of hypoglycemic drugs and metformin with cardiorespiratory fitness and mitochondrial oxidative capacity

|                          | All hypoglycemic agents |             | Metformin           |              |
|--------------------------|-------------------------|-------------|---------------------|--------------|
|                          | $\beta$ estimate        | p-value     | $\beta$ estimate    | p-value      |
| VO <sub>2</sub> peak     | -82.27 ± 62.24          | 0.19        | -13.08 ± 55.47      | 0.81         |
| ATPmax                   | <b>-0.05 ± 0.03</b>     | <b>0.05</b> | <b>-0.06 ± 0.02</b> | <b>0.01*</b> |
| OXPHOS <sub>CHO</sub>    | -1.03 ± 2.01            | 0.61        | -0.71 ± 1.81        | 0.70         |
| maxOXPHOS <sub>CHO</sub> | -3.52 ± 3.20            | 0.27        | -3.11 ± 2.89        | 0.28         |
| maxETS <sub>CHO</sub>    | -2.95 ± 4.45            | 0.51        | -4.07 ± 4.04        | 0.32         |
| OXPHOS <sub>FAO</sub>    | -1.35 ± 1.06            | 0.21        | -0.68 ± 1.00        | 0.50         |
| maxOXPHOS <sub>FAO</sub> | -2.57 ± 3.69            | 0.49        | -5.30 ± 3.43        | 0.13         |

$\beta$  estimate ± standard error with significance accepted at **p<0.05**. Data adjusted for age, race, and site/technician. ATPmax = maximal adenosine triphosphate production, OXPHOS<sub>CHO</sub> = carbohydrate supported respiration, maxOXPHOS<sub>CHO</sub> = carbohydrate supported maximal complex I+II stimulated respiration, maxETS<sub>CHO</sub> = carbohydrate supported maximal electron transport system, OXPHOS<sub>FAO</sub> = fatty acid oxidation (FAO) supported respiration, maxOXPHOS<sub>FAO</sub> = fatty acid oxidation supported maximal complex I+II stimulated respiration.
