# Supplementary material
Source: publisher figshare collection journal article supplement (https://diabetesjournals.figshare.com/articles/dataset/_/25492276)

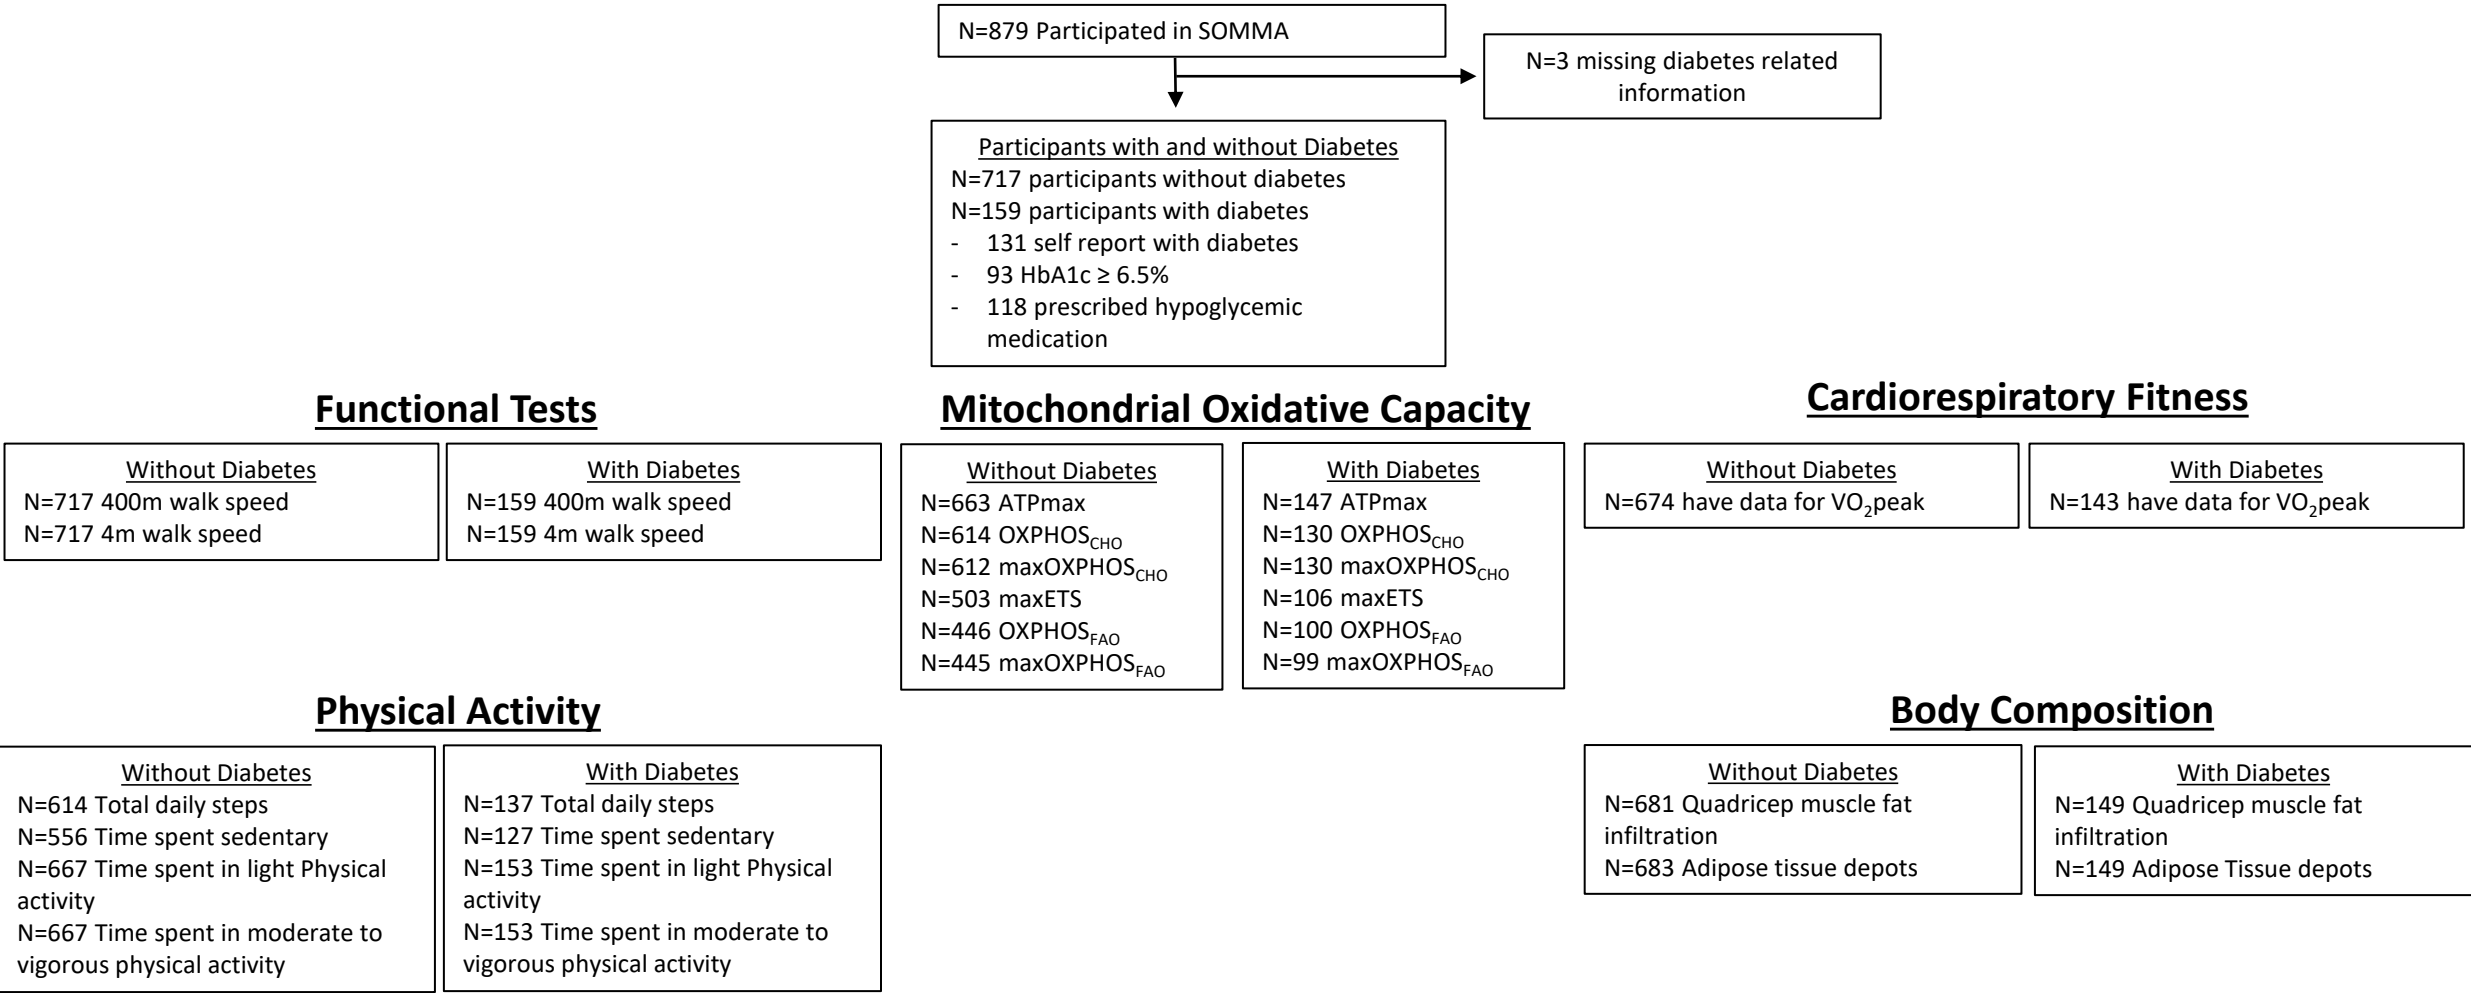

Supplemental Figure 1.

Supplement: Supplementary file 2 [file 1]
